# Supplementary material
Source: PubMed Central journal article supplement (PMC2958040)
Supplement: NIHMS237010-supplement-Supplementary_Information.pdf [file NIHMS237010-supplement-Supplementary_Information.pdf]

**Differential Methylation of Tissue- and Cancer-specific CpG Island Shores Distinguishes Human Induced Pluripotent Stem Cells, Embryonic Stem Cells, and Fibroblasts**

Akiko Doi<sup>1,\*</sup>, In-Hyun Park<sup>2,\*</sup>, Bo Wen<sup>1,\*</sup>, Peter Murakami<sup>1</sup>, Martin J. Aryee<sup>3,4</sup>, Rafael Irizarry<sup>3</sup>, Brian Herb<sup>1</sup>, Christine Ladd-Acosta<sup>1</sup>, Junsung Rho<sup>2</sup>, Sabine Loewer<sup>2</sup>, Justine Miller<sup>2</sup>, Thorsten Schlaeger<sup>2</sup>, George Q. Daley<sup>2,+</sup>, Andrew P. Feinberg<sup>1,+</sup>

<sup>1</sup>Center for Epigenetics and Department of Medicine, Johns Hopkins University School of Medicine, Baltimore, Maryland, USA; <sup>2</sup>Division of Pediatric Hematology/Oncology, Children's Hospital Boston and Howard Hughes Medical Institute, Boston, Massachusetts 02115, USA; <sup>3</sup>Department of Biostatistics, Johns Hopkins Bloomberg School of Public Health, Baltimore, Maryland, USA; <sup>4</sup>Sidney Kimmel Comprehensive Cancer Center, Johns Hopkins University, Baltimore, Maryland, USA.

\*Equal contribution from these authors

<sup>+</sup>These authors jointly supervised this work. Address correspondence to G.Q.D. ([George.Daley@childrens.harvard.edu](mailto:George.Daley@childrens.harvard.edu)) and A.P.F. ([afeinberg@jhu.edu](mailto:afeinberg@jhu.edu))

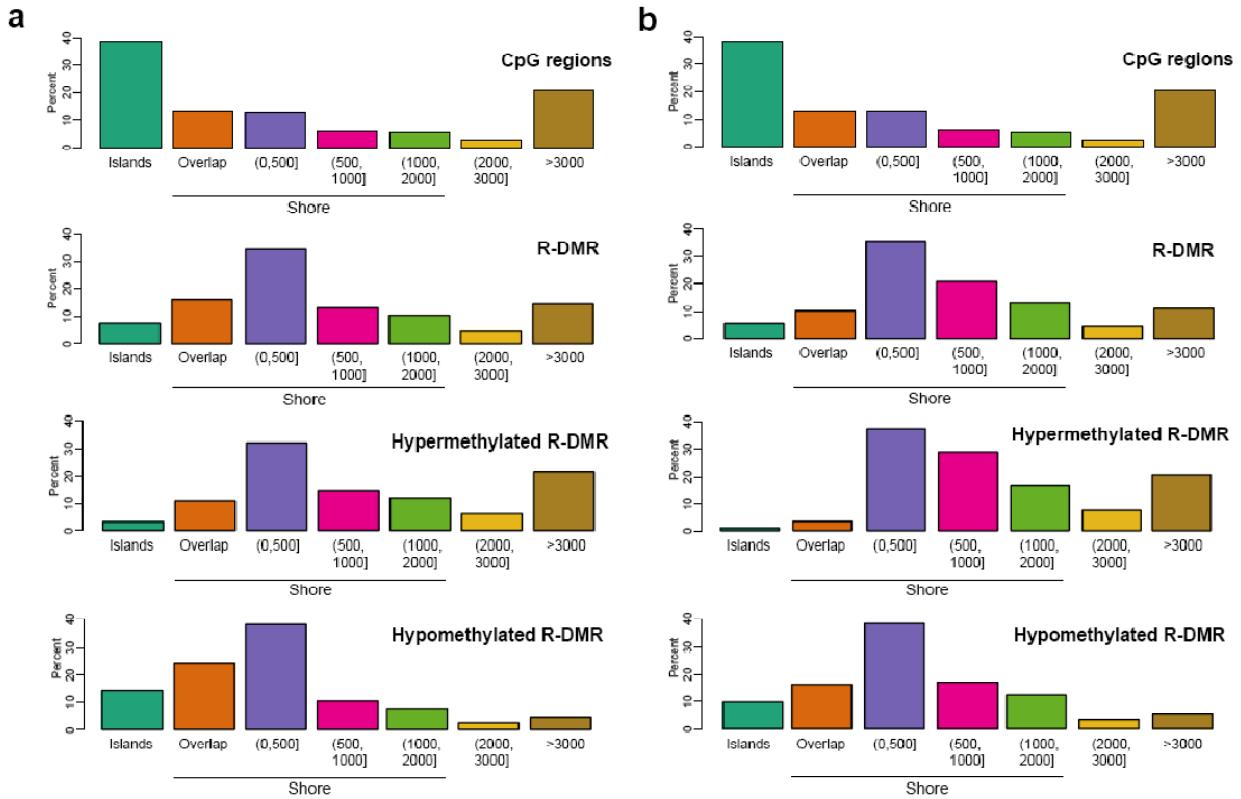

**Supplementary Figure 1. Distribution of distance of reprogramming differentially methylated regions (R-DMRs) from CpG islands.** Islands (teal) are regions that are inside, cover, or overlap more than 50% of a CpG island. Overlap (orange) are regions that overlap 0.1-50% of a CpG island. Regions denoted by (0, 500] (blue) are regions located  $\leq 500$  bp but do not overlap an island. Regions denoted by (500, 1000] (pink) are regions located  $> 500$  bp and  $\leq 1000$  bp from an island. Regions denoted by (1000, 2000] (green) are regions located  $> 1000$  bp and  $\leq 2000$  bp from an island. Regions denoted by (2000, 3000] (yellow) are regions located  $> 2000$  bp and  $\leq 3000$  bp from an island. Regions denoted by  $> 3000$  (brown) are  $> 3000$  bp from an island. Percentage are given for the CpG regions (CHARM array, null hypothesis) and reprogramming differentially methylated regions (R-DMRs) as well as the R-DMRs subdivided into hypermethylation and hypomethylation in iPS relative to fibroblast. Percentages of each class is given for **(a)** R-DMRs from the first experiment ( $n=6$  for each cell type) (R-DMR panel is duplicated from Fig. 1a) and **(b)** R-DMRs from second experiment ( $n=3$  for each cell type).

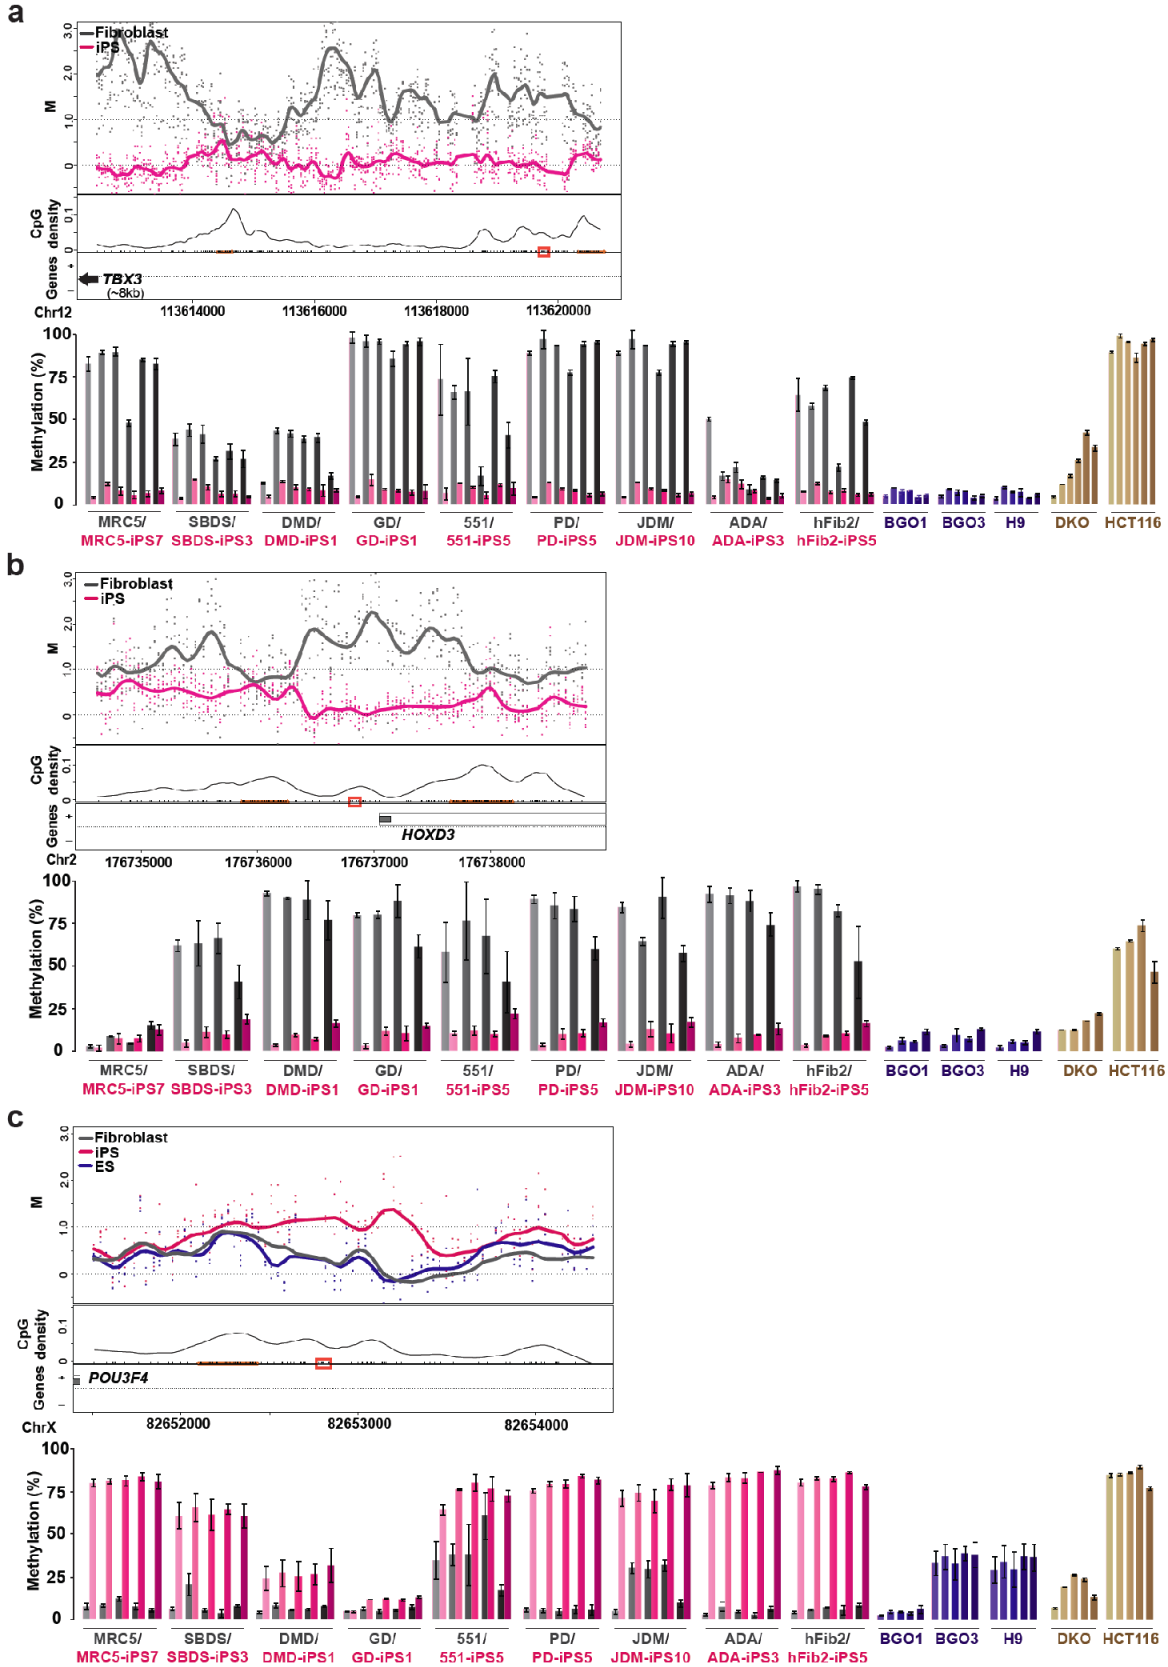

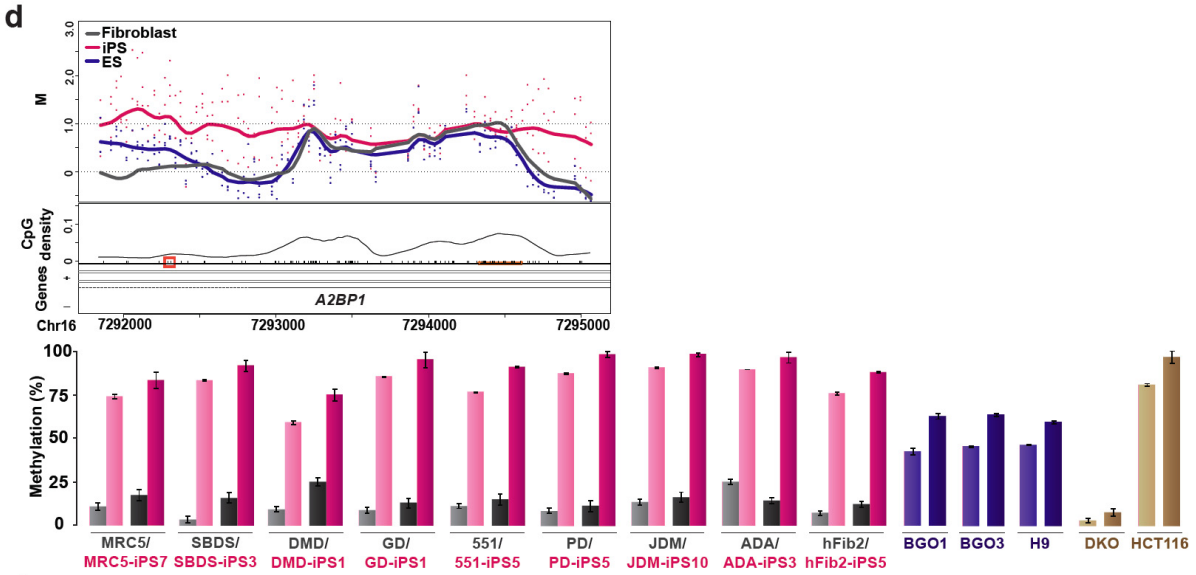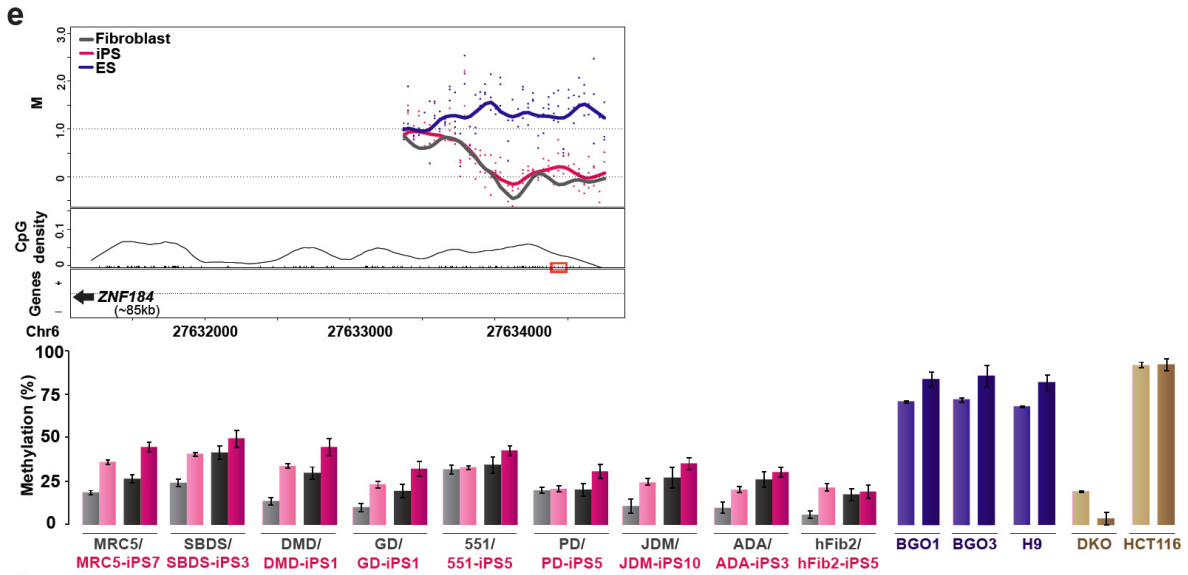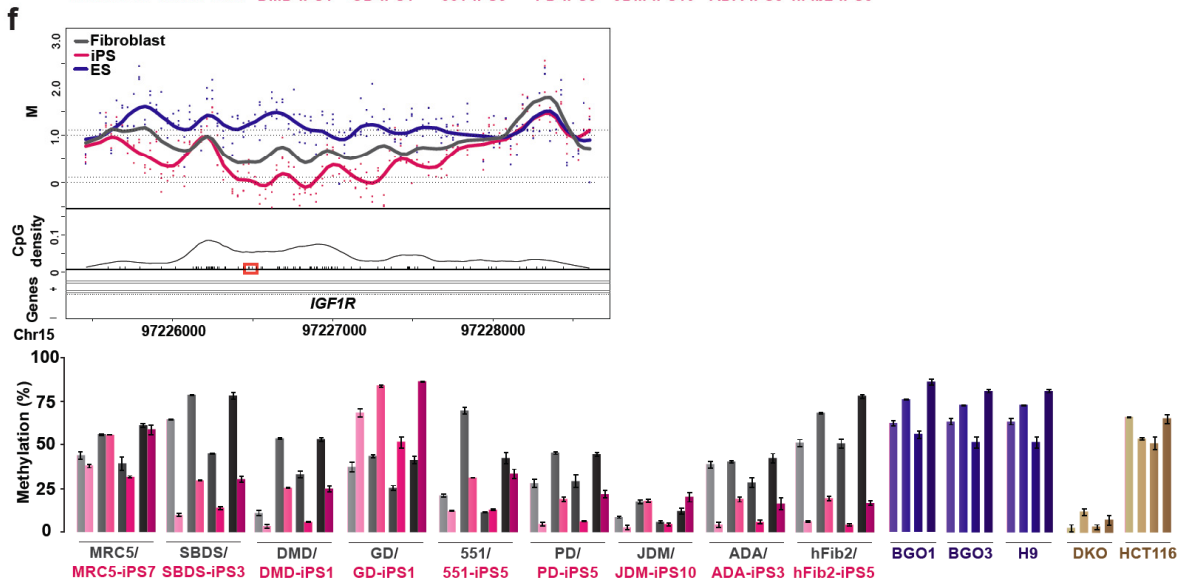

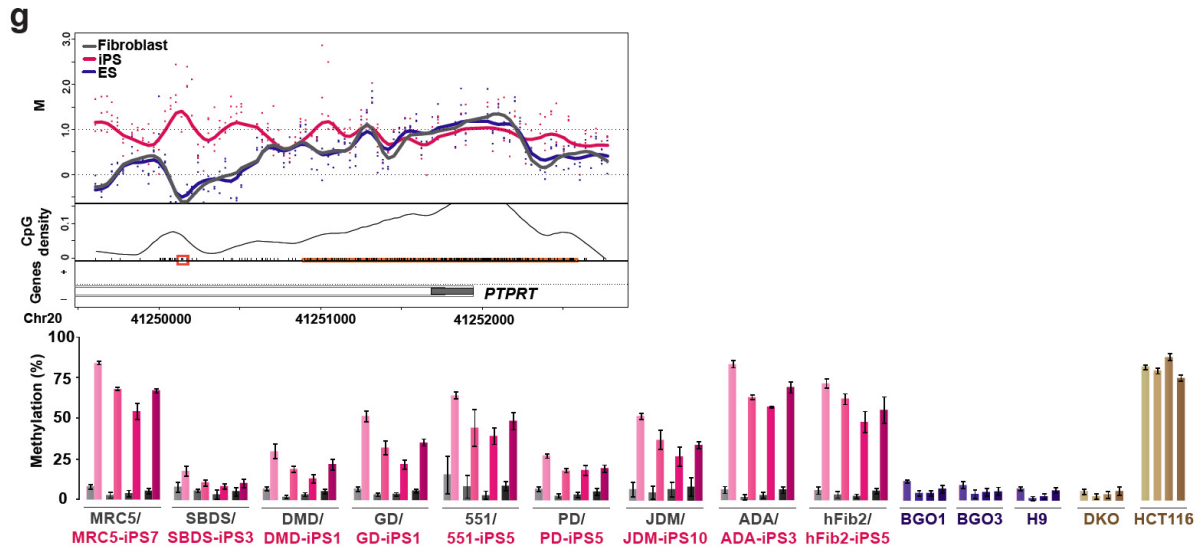

**Supplementary Figure 2. (a-g) Examples of differential DNA methylation (upper panel) and confirmation by bisulfite pyrosequencing (lower panel).** The upper panel is a plot of M value versus genomic location, where the curve represents averaged smoothed M values. Also shown in the upper panel are the location of CpG dinucleotide (black tick marks on x axis), CpG density (smoothed black line) calculated across the region using a standard density estimator, location of CpG islands (orange line), as well as gene annotation indicating the transcript (thin outer gray line), coding region (thin inner gray line), exons (filled gray box) and gene transcription directionality on the y axis (sense marked as +, antisense as -). The lower panel represents the degree of DNA methylation as measured by bisulfite pyrosequencing. The red box indicated on the x axis of the CpG density plot in the upper panel indicates the CpG sites that were measured. Reactions were done in triplicate; bars represent the mean methylation  $\pm$ SD of iPS cells (pink), fibroblast (gray) and ES (blue) as well as DKO (*DNMT1* and *DNMT3B* Double KO cell line) and HCT116 (parental colon cancer cell line) for each individual CpG site measured. (a-b) are DMRs found by comparison between iPS cells and fibroblast (n=6), (c-g) is a DMR found by comparison between iPS cells and ES cells (n=3). (a) *TBX3* (T-box 3 protein), (b) *HOXD3* (Homeobox D3), (c) *POU3F4* (POU domain, class 3, transcription factor 4), (d) *A2BP1* (ataxin 2-binding protein 1), (e) *ZNF184* (zinc finger protein 184), (f) *IGF1R* (insulin-like growth factor 1 receptor), (g) *PTPRT* (protein tyrosine phosphatase, receptor type, T).

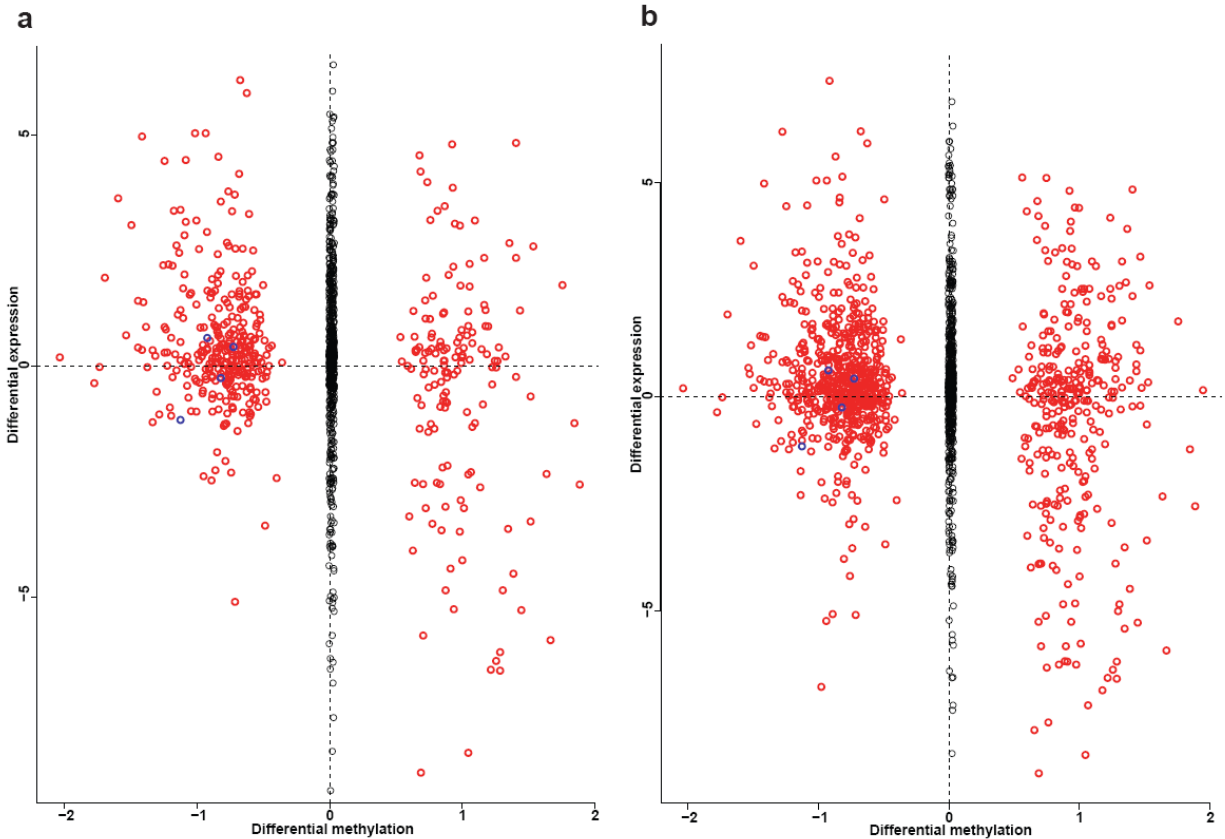

**Supplementary Figure 3. Gene expression strongly correlates with reprogramming differentially methylated regions (R-DMRs) at CpG island shores.** Red circles represent R-DMRs that are within 2kb from a CpG island, blue circles represent those that are more than 2kb away from a CpG island, and black circles represent log ratios for all genes not within (a) 500bp or (b) 1kb from the transcriptional start site (TSS) of an annotated gene. The  $\log_2$  ratios of fibroblast to iPS expression were plotted against  $\Delta M$  values (fibroblast minus iPS) for R-DMRs in which one of the two points had approximately no methylation. **(a)** DMRs that are within 500bp from a TSS of a gene. **(b)** DMRs that are within 1kb from a TSS of a gene.

**Supplementary Table 3. Reprogramming differentially methylated regions (R-DMRs) overlap with bivalent domains. Overlap is significant in hypomethylated R-DMRs but not in hypermethylated R-DMRs.**

| Methylation                                | Total Number | Overlap with bivalent domain |              |                 |
|--------------------------------------------|--------------|------------------------------|--------------|-----------------|
|                                            |              |                              | Number       | <i>P</i> Value* |
| R-DMRs                                     | 4401         | Observed                     | 1624 (36.9%) | <0.0001         |
|                                            |              | Random                       | 833          |                 |
| Hypermethylated R-DMRs<br>(iPS>Fibroblast) | 2663         | Observed                     | 495 (18.6%)  | 0.5699          |
|                                            |              | Random                       | 498          |                 |
| Hypomethylated R-DMRs<br>(iPS<Fibroblast)  | 1738         | Observed                     | 1129 (65%)   | <0.0001         |
|                                            |              | Random                       | 335          |                 |

\**P* values based on 10,000 permutations. Random values are averages over all 10,000 iterations.

**Supplementary Table 4. Reprogramming differentially methylated regions (R-DMRs) overlap with *POU5F1*, *NANOG*, and *SOX2* binding sites. Overlap is significant in hypomethylated R-DMRs but not in hypermethylated R-DMRs.**

| Methylation                             | Total Number | Number of DMRs on promoter array* | Overlap with <i>POU5F1</i> -binding sites* |                  | Overlap with <i>NANOG</i> -binding sites* |                  | Overlap with <i>SOX2</i> -binding sites* |                  |         |
|-----------------------------------------|--------------|-----------------------------------|--------------------------------------------|------------------|-------------------------------------------|------------------|------------------------------------------|------------------|---------|
|                                         |              |                                   | Number                                     | <i>P</i> Value** | Number                                    | <i>P</i> Value** | Number                                   | <i>P</i> Value** |         |
| R-DMRs                                  | 4401         | 1963                              | Observed                                   | 85               | <0.0001                                   | 157              | <0.0001                                  | 101              | <0.0001 |
|                                         |              |                                   | Random                                     | 27               |                                           | 83               |                                          | 65               |         |
| Hypermethylated R-DMRs (iPS>Fibroblast) | 2663         | 1202                              | Observed                                   | 2                | 1                                         | 20               | 1                                        | 9                | 1       |
|                                         |              |                                   | Random                                     | 16               |                                           | 49               |                                          | 38               |         |
| Hypomethylated R-DMRs (iPS<Fibroblast)  | 1738         | 761                               | Observed                                   | 83               | <0.0001                                   | 137              | <0.0001                                  | 92               | <0.0001 |
|                                         |              |                                   | Random                                     | 11               |                                           | 34               |                                          | 27               |         |

\* Data from Boyer *et al. Cell.* **122**, 947-56 (2005).

\*\**P* values based on 10,000 permutations. Random values are averages over all 10,000 iterations.



**Supplementary Table 7. Gene ontology functional categories enriched in differentially methylated regions between iPS cells and ES cells.**

| Methylation                                 | GO ID      | Term                                                                                | Count | %      | Fold Enrichment | <i>P</i> Value |
|---------------------------------------------|------------|-------------------------------------------------------------------------------------|-------|--------|-----------------|----------------|
| Hypermethylated<br>in iPS compared<br>to ES | GO:0007275 | multicellular organismal development                                                | 14    | 31.82% | 2.69251         | 6.81E-04       |
|                                             | GO:0032501 | multicellular organismal process                                                    | 18    | 40.91% | 2.163279        | 7.23E-04       |
|                                             | GO:0048731 | system development                                                                  | 11    | 25.00% | 2.823529        | 0.00294        |
|                                             | GO:0065007 | biological regulation                                                               | 20    | 45.45% | 1.724951        | 0.00477        |
|                                             | GO:0007399 | nervous system development                                                          | 7     | 15.91% | 4.054299        | 0.00575        |
|                                             | GO:0045944 | positive regulation of transcription from RNA polymerase II promoter                | 4     | 9.09%  | 10.5676         | 0.00579        |
| Hypomethylated<br>in iPS compared<br>to ES  | GO:0050794 | regulation of cellular process                                                      | 12    | 70.59% | 2.778833        | 1.63E-04       |
|                                             | GO:0050789 | regulation of biological process                                                    | 12    | 70.59% | 2.582055        | 3.36E-04       |
|                                             | GO:0065007 | biological regulation                                                               | 12    | 70.59% | 2.345934        | 8.57E-04       |
|                                             | GO:0006355 | regulation of transcription, DNA-dependent                                          | 8     | 47.06% | 3.368421        | 0.00303        |
|                                             | GO:0006351 | transcription, DNA-dependent                                                        | 8     | 47.06% | 3.293928        | 0.00345        |
|                                             | GO:0032774 | RNA biosynthetic process                                                            | 8     | 47.06% | 3.28996         | 0.00348        |
|                                             | GO:0045449 | regulation of transcription                                                         | 8     | 47.06% | 3.153195        | 0.00446        |
|                                             | GO:0019219 | regulation of nucleobase, nucleoside, nucleotide and nucleic acid metabolic process | 8     | 47.06% | 3.082017        | 0.00509        |
|                                             | GO:0006350 | transcription                                                                       | 8     | 47.06% | 3.039703        | 0.00551        |
|                                             | GO:0043283 | biopolymer metabolic process                                                        | 11    | 64.71% | 2.101101        | 0.00588        |
|                                             | GO:0010468 | regulation of gene expression                                                       | 8     | 47.06% | 2.968116        | 0.00632        |
|                                             | GO:0010467 | gene expression                                                                     | 9     | 52.94% | 2.500271        | 0.00792        |
|                                             | GO:0031323 | regulation of cellular metabolic process                                            | 8     | 47.06% | 2.851375        | 0.00795        |
|                                             | GO:0019222 | regulation of metabolic process                                                     | 8     | 47.06% | 2.753613        | 0.00968        |

**Supplementary Table 9. Reprogramming differentially methylated regions (R-DMRs), and the DMRs that distinguish iPS cells from ES cells, overlap with cancer-specific differentially methylated regions (C-DMRs).**

| DMR                                  | Total Number | Methylation    | Overlap with                  |                 |                |                              |                 |                |
|--------------------------------------|--------------|----------------|-------------------------------|-----------------|----------------|------------------------------|-----------------|----------------|
|                                      |              |                | Hypermethylated C-DMRs (1508) |                 |                | Hypomethylated C-DMRs (1199) |                 |                |
|                                      |              |                | Number                        | Fold Enrichment | <i>P</i> Value | Number                       | Fold Enrichment | <i>P</i> Value |
| iPS-Fibroblast DMRs (R-DMRs)* (n=6)  | 4401         | iPS>Fib (2663) | 99                            | 1.54            | <0.0001        | 293                          | 5.49            | <0.0001        |
|                                      |              | Random         | 64                            |                 |                | 53                           |                 |                |
|                                      |              | Fib>iPS (1738) | 294                           | 6.53            | <0.0001        | 33                           | 0.91            | 0.74           |
|                                      |              | Random         | 45                            |                 |                | 36                           |                 |                |
| iPS-ES DMRs** (n=3)                  | 71           | iPS>ES (51)    | 10                            | 7.93            | <0.0001        | 2                            | 1.93            | 0.28           |
|                                      |              | Random         | 1.3                           |                 |                | 1.0                          |                 |                |
|                                      |              | ES>iPS (20)    | 4                             | 7.86            | 0.0015         | 1                            | 2.48            | 0.33           |
|                                      |              | Random         | 0.51                          |                 |                | 0.40                         |                 |                |
| iPS-Fibroblast DMRs (R-DMRs)** (n=3) | 2179         | iPS>Fib (988)  | 56                            | 2.72            | <0.0001        | 83                           | 4.42            | <0.0001        |
|                                      |              | Random         | 21                            |                 |                | 18                           |                 |                |
|                                      |              | Fib>iPS (1191) | 230                           | 8.84            | <0.0001        | 20                           | 0.86            | 0.78           |
|                                      |              | Random         | 26                            |                 |                | 23                           |                 |                |

\* FDR cutoff of 0.05.

\*\*Absolute area cutoff of 10.0.

*P* values based on 10,000 permutations. Random values are averages over all 10,000 iterations.

**Supplementary Table 10. Primer sequences and location of CpG sites examined using bisulfite pyrosequencing.**

| Gene          | Primer         | Sequence (5' → 3')                 | Chromosomal Coordinates |           |           |           |           |           |           |
|---------------|----------------|------------------------------------|-------------------------|-----------|-----------|-----------|-----------|-----------|-----------|
|               |                |                                    | Chr                     | CG1       | CG2       | CG3       | CG4       | CG5       | CG6       |
| <i>BMP7</i>   | Forward        | TTTGGTTTGAAATGTATTAATATA           |                         |           |           |           |           |           |           |
|               | Reverse        | TAACAATACCAAAAAATACTAAAACACTACTA   |                         |           |           |           |           |           |           |
|               | Nested forward | TTTTGGTTTTAAAATAATAAAGTAATTATT     | 20                      | 55268092  | 55268094  | 55268113  | 55268115  | 55268135  |           |
|               | Nested reverse | /5Biosg/AACTCAAACAAACATATACAATACC  |                         |           |           |           |           |           |           |
|               | Sequencing (F) | GTTGTTATTAATTTAATTTATT             |                         |           |           |           |           |           |           |
| <i>GSC</i>    | Forward        | GATTTAAGTTATTATGTTTTAGGGTAGATA     |                         |           |           |           |           |           |           |
|               | Reverse        | AAAACAATATTCCAAATAAAAAAAA          |                         |           |           |           |           |           |           |
|               | Nested forward | TTAGGTTTAAAGTTATAGGGTAGTTGATG      | 14                      | 94308388  | 94308412  | 94308417  | 94308422  | 94308424  |           |
|               | Nested reverse | /5Biosg/TTAACATCTTTACAAAAACAAAAC   |                         |           |           |           |           |           |           |
|               | Sequencing (F) | GTAATTTATTAGTGATTGTTT              |                         |           |           |           |           |           |           |
| <i>PTPRT</i>  | Forward        | TTAAAGAGTAAATAAAGAAAAGGTGTT        |                         |           |           |           |           |           |           |
|               | Reverse        | AATCCTAAAAATCCAAACATAATTC          |                         |           |           |           |           |           |           |
|               | Nested forward | TGAAAGTAATTAGATTTGTATTTTAATAGT     | 20                      | 41250110  | 41250112  | 41250118  | 41250145  |           |           |
|               | Nested reverse | /5Biosg/AATTTTATATCCTCTAAAACATAACC |                         |           |           |           |           |           |           |
|               | Sequencing (F) | GATGGAATATTTTTGATTTTGT             |                         |           |           |           |           |           |           |
| <i>TBX3</i>   | Forward        | TTAGGATTTAGGGTTTTGTTTTTT           |                         |           |           |           |           |           |           |
|               | Reverse        | TATCATCTTCCTAAATATTTACAAAATATT     |                         |           |           |           |           |           |           |
|               | Nested forward | GTGGGTAGGAAGAAGTTTTAAGGTT          | 12                      | 113619701 | 113619716 | 113619732 | 113619736 | 113619746 | 113619751 |
|               | Nested reverse | /5Biosg/AACTCATTCTCAAATAAAAAACCC   |                         |           |           |           |           |           |           |
|               | Sequencing (F) | TTATTAGAGTTTTTTAGTAGATT            |                         |           |           |           |           |           |           |
| <i>HOXD3</i>  | Forward        | GTAGATTGGTTTTTTTGTATTTTTG          |                         |           |           |           |           |           |           |
|               | Reverse        | TATAAACTCTCAAATTTCTTTTAATATCT      |                         |           |           |           |           |           |           |
|               | Nested forward | GATTTATTTGGTTAGAGGGTTTGG           | 2                       | 176736800 | 176736811 | 176736815 | 176736852 |           |           |
|               | Nested reverse | /5Biosg/AAAAAACTTTTCCCACTTAAAAAAC  |                         |           |           |           |           |           |           |
|               | Sequencing (F) | GATTTATTTGGTTAGAGGGTTTGG           |                         |           |           |           |           |           |           |
| <i>POU3F4</i> | Forward        | AAGGTTATAGGGATTTTGGTTTATT          |                         |           |           |           |           |           |           |
|               | Reverse        | CCACAACAACACTACATATTTTTAAAA        |                         |           |           |           |           |           |           |
|               | Nested forward | ATTTTTGTGTGTATGTGTTTTTGTG          | X                       | 82652791  | 82652795  | 82652797  | 82652805  | 82652832  |           |
|               | Nested reverse | /5Biosg/CTCTACACAACCTAACCAATTTTT   |                         |           |           |           |           |           |           |
|               | Sequencing (F) | ATTTTTGTGTGTATGTGTTTTTGTG          |                         |           |           |           |           |           |           |
| <i>A2BP1</i>  | Forward        | TTTTTGATAAATTGATGGGATGTG           |                         |           |           |           |           |           |           |
|               | Reverse        | AACCCTAAAACCTAACCAAAAAAC           |                         |           |           |           |           |           |           |
|               | Nested forward | TAAGATGAAAAGTGAAAGAAATAG           | 16                      | 7292289   | 7292308   |           |           |           |           |
|               | Nested reverse | /5Biosg/ATAAAAACTCTAAACCCAACCATCA  |                         |           |           |           |           |           |           |

---

|               |                |                                   |    |          |          |          |          |
|---------------|----------------|-----------------------------------|----|----------|----------|----------|----------|
|               | Sequencing (F) | GAAGATTTTATAGTTATTTTAAATAG        |    |          |          |          |          |
| <i>ZNF184</i> | Forward        | AAAAGAAAATTTTAAAGTTATAAAATT       |    |          |          |          |          |
|               | Reverse        | AAATCAAAATCCATATCTCATTTAATCTAA    |    |          |          |          |          |
|               | Nested forward | TTGGGAGAGTTTTAAAGTTATTTGG         | 6  | 27634436 | 27634468 |          |          |
|               | Nested reverse | /5Biosg/TAActCCAATCCAAAATTTTCTCTC |    |          |          |          |          |
|               | Sequencing (F) | TGGGAGAGTTTTAAAGTTATTTGGA         |    |          |          |          |          |
| <i>IGF1R</i>  | Forward        | GTGGTTTGGGAAGATATGAATTTT          |    |          |          |          |          |
|               | Reverse        | AAAATAAAAACCCCTTTTCTTAC           |    |          |          |          |          |
|               | Nested forward | AAGGTTTTTTATTGTTTTTGATTA          | 15 | 97226473 | 97226475 | 97226481 | 97226497 |
|               | Nested reverse | /5Biosg/AAAATCCTAAACCTCCACTTC     |    |          |          |          |          |
|               | Sequencing (F) | AGGTTTTTTATTGTTTTTGATTA           |    |          |          |          |          |

---

/5Biosg/ = 5' biotin added

F = forward
